# Supplementary material for: Plant circadian rhythms regulate the effectiveness of a glyphosate-based herbicide
Source: PubMed Central journal article supplement (PMC6697731; doi:10.1038/s41467-019-11709-5), 2019-08-16
Supplement: 41467_2019_11709_MOESM2_ESM.pdf [file 41467_2019_11709_MOESM2_ESM.pdf]

## **Description of Additional Supplementary Files**

File Name: Supplementary Data 1

Description: Transcripts that are both glyphosate-responsive and circadian or diel-regulated. Genes involved in auxin biosynthesis or signalling are highlighted. List of GO terms related to auxin that were used in a comparison between those and glyphosate and light-dark/circadian regulated lists. Gene names from TAIR genome annotations v11.

File Name: Supplementary Data 2

Description: Statistical analysis of data from all experiments. Sample sizes, statistical tests used and analysis output including p values are provided for all experiments. Each spreadsheet tab contains the analysis for one figure.
